# Supplementary material for: Three Major Nucleotide Polymorphisms in the Waxy Gene Correlated with the Amounts of Extra-long Chains of Amylopectin in Rice Cultivars with S or L-type Amylopectin
Source: PubMed Central journal article supplement — J Appl Glycosci (1999). 2019 Feb 20;66(1):37–46. doi: 10.5458/jag.jag.JAG-2018_005 (PMC8056923; doi:10.5458/jag.jag.jag-2018_005), 2019-02-20
Supplement: JAG-66-037-s01.pdf [file JAG-66-037-s01.pdf]

Table S1. List of oligonucleotide sequences.

| #  | Direction | Oligonucleotide sequence    |
|----|-----------|-----------------------------|
| 1  | Forward   | 5' CACATCAGCGCCACGTCAGA 3'  |
| 2  | Forward   | 5' GCCACTGGAGAAACAGATCAG 3' |
| 3  | Forward   | 5' TCTTTTAGGCTCACCAAACC 3'  |
| 4  | Forward   | 5' ATACCAGCGTTGTGGCTGAG 3'  |
| 5  | Forward   | 5' TGTGTTTCGTCTGCAACGACT 3' |
| 6  | Forward   | 5' TACGAGGAGATGGTCAGGAA 3'  |
| 7  | Reverse   | 5' GACGTGGTGAGAGCCGACATG 3' |
| 8  | Reverse   | 5' TCTTGAGCAGCTTCTCGAAC 3'  |
| 9  | Reverse   | 5' TGGTTCATGCAGTTCCTGAC 3'  |
| 10 | Reverse   | 5' CGTCTCTCATCCATATACTG 3'  |

PCR products of primer #1 and #7 with 2,881 bp containing promoter, exon 1 and intron 1 were sequenced using primer #1, #2, #3, and #7. PCR products of primer #3 and #8 with 2,495 bp containing 5'UTR to exon 10 were sequenced with primer #3, #4, #5, #7 and #8. PCR products of primer #4 and #10 with 3,027 bp containing exon 2 to 3'UTR were sequenced with primer #4, #6, #8, #9, and #10. Approximate locations of primers are shown in Supplemental Fig. 1.
