# Supplementary material for: Three Major Nucleotide Polymorphisms in the Waxy Gene Correlated with the Amounts of Extra-long Chains of Amylopectin in Rice Cultivars with S or L-type Amylopectin
Source: PubMed Central journal article supplement — J Appl Glycosci (1999). 2019 Feb 20;66(1):37–46. doi: 10.5458/jag.jag.JAG-2018_005 (PMC8056923; doi:10.5458/jag.jag.jag-2018_005), 2019-02-20
Supplement: JAG-66-037-s03.pdf [file JAG-66-037-s03.pdf]

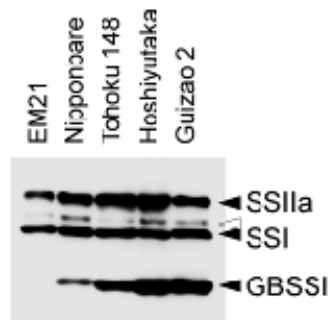

**Fig. S2.** Protein expression levels of SSI, SSIIa, and GBSSI in Tohoku 148 along with other representative rice lines. Total proteins were analyzed by western blotting using indicated antibodies.
